# Supplementary material for: Processing Issues of High Tc Conductors
Source: MDPI journal article supplement (doi:10.3390/ma15103476), 1993-12-01
Supplement: s1 [file s1]

---

Supplementary Material

**EFFECTS OF FUSED SILICA ADDITION ON THERMAL EXPANSION,  
DENSITY AND HARDNESS OF ALUMIX-231 BASED METAL MATRIX  
COMPOSITES**

L.M. Rodrigues, B.A. Marinkovic\*

Department of Chemical and Materials Engineering, Pontifícia Universidade Católica do Rio  
de Janeiro (PUC-Rio), Rio de Janeiro, RJ, Brazil

\*e-mail: [bojan@puc-rio.br](mailto:bojan@puc-rio.br)

XRPD of pellets MMC-5 vol.% of fused silica, sintered at 565 and 575 °C.

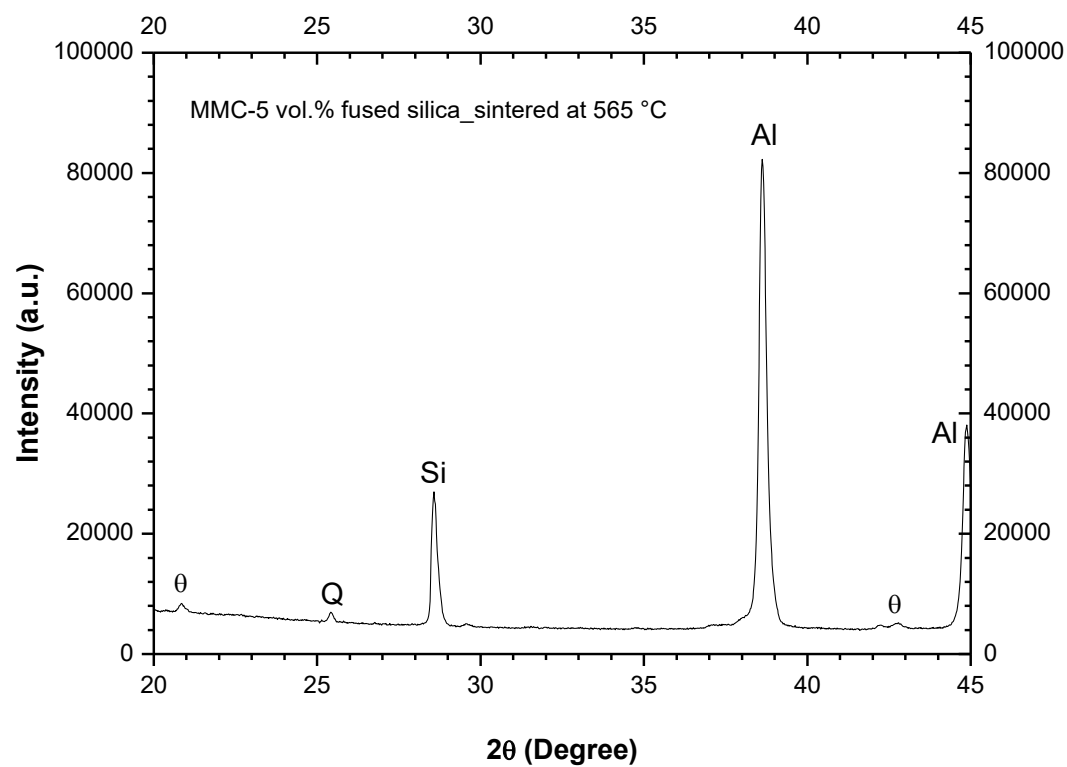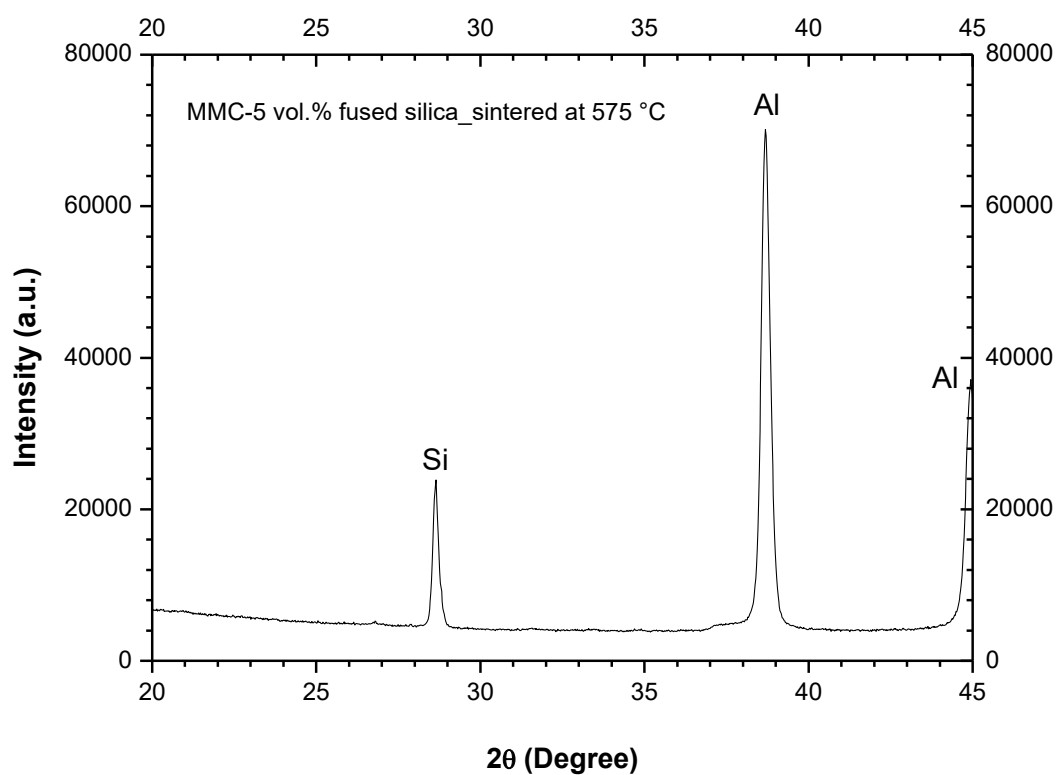

Figure S1: XRPD patterns of MMC-5 vol.%, sintered at 565 and 575 °C.

## Thermomechanical properties.

**Table S1:** Thermomechanical properties of Alumix-231 and fused silica.

| <b>Material</b>     | <b>Young modulus (GPa)</b> | <b>Shear modulus (GPa)</b> | <b>Bulk modulus (GPa)</b> | <b>Poisson coefficient</b> | <b>Coefficient of thermal expansion (<math>\times 10^{-6} \text{ } ^\circ\text{C}^{-1}</math>)</b> | <b>Density (<math>\text{g/cm}^3</math>)</b> |
|---------------------|----------------------------|----------------------------|---------------------------|----------------------------|----------------------------------------------------------------------------------------------------|---------------------------------------------|
| <b>Alumix-231</b>   | 83 [12]                    | 31.13 <sup>a</sup>         | 83.00 <sup>b</sup>        | 0.33                       | 18.50 [13]                                                                                         | 2.668 [20] / 2.634 [12]                     |
| <b>Fused silica</b> | 72 [24]                    | 31.00 <sup>a</sup>         | 41.00 <sup>b</sup>        | 0.17                       | 0.54 [22]                                                                                          | 2.250 [23]                                  |

a,b—calculated using the relationships between elastic constants.
